# Supplementary material for: Fluoride recognition in ‘super-extended cavity’ calix[4]pyrroles
Source: Royal Society of Chemistry journal article supplement (doi:10.1039/b003229h), 2000-01-01
Supplement: b003229h.doc [file b003229h.doc]

# Fluoride recognition in ‘super-extended cavity’ calix[4]pyrroles

Salvatore Camiolo and Philip A. Gale*

Department of Chemistry, University of Southampton, Southampton, SO17 1BJ, UK.

**Supplementary information.**

**Compound 4**

Compound **2** (1.52g, 2 mmol) and K2CO3 (1.76g,13 mmol) were suspended in acetone (150ml dry) and stirred for 2 hours. BrCH2COOEt (3.12g, 14mmol) was added and the suspension was refluxed for 5 days. After cooling the solution was filtered off to remove K2CO3, and the solvent removed *in vacuo*. An orange oil was obtained that was dissolved in dichloromethane (50ml) and washed with water (3 x 20ml). The organic phase was separated and then dried with MgSO4. The solvent was removed in vacuo affording an oil which was triturated with EtOH (50ml) affording the product as a white powder which was collected by filtration and dried under high vacuum (76.5% yield).

1H NMR 300 MHz in *d6*-DMSO , ppm: 1.31 (12H, t, *J* = 7.0Hz, CH3),1.83 (12H, s, CCH3), 4.24 (8H, q, *J =* 7.0Hz, OCH2), 4.78 (12H, s, OCH2CO), 6.06 (8H, s, pyrr. CH), 6.86 (8H, d, *J* =8.5Hz, ArH), 6.96 (8H, d, *J=* 8.5Hz, ArH), 9.55 (4H, s, NH).

13C NMR 75.42 MHz in *d6*-DMSO , ppm: 14.57, 30.39, 44.78, 62.00, 66.06, 105.71, 114.79, 129.82, 138.91, 143.06, 157.50, 169.94.

+ve ESMS: 1084.8 (MH+), 1106.7 (MNa+), 1122 (MK+).

Satisfactory microanalysis data obtained.

**Figure S1** The 1H NMR of compound **4** in DMSO-*d6*

**Figure S2** The 13C NMR of compound **4** in DMSO-*d6*

**Figure S3** The electrospray MS of compound **4**.

Compound **5**

Compound **2** (1.0g, 1.3mmol) and K2CO3 (1.55g, 11.4mmol) were suspended in 120ml of fresh distilled acetone and stirred for 2 hours. Potassium iodide (1.8g, 11mmol) and 2-chloro-*N,N*-diethylacetamide (1.63g, 11mmol) were added and the suspension stirred for 5 days. The solvent was removed *in vacuo* and the orange solid was suspended in dichloromethane (50ml). The suspension was filtered to eliminate potassium carbonate and washed with water (3x20ml), dried and the solvent removed in vacuo affording an orange solid that was triturated in diethyl ether. The product was collected by filtration (affording a white solid) and dried *in vacuo* (0.70g, 50%).

# 1H NMR 300 MHz in d6-DMSO , ppm: 1.09 (12H, t, J=7.0Hz, CH3), 1.24 (12H, t, J = 7.0, CH3), 1.84 (12H, s, CCH3), 3.37 (16H, m, CH2), 4.76 (8H, s, OCH2CO), 6.06 (8H, s, pyrr. CH), 6.88 (16H, m, ArH), 9.56 (4H, s, NH).

# 13C NMR 75.42 MHz in d6-DMSO , ppm: 12.39, 13.70, 30.97, 43.06, 65.57, 104.03, 113.80, 127.40, 136.95, 142.11, 156.43, 165.70.

# +ve ESMS: 1193.2 (MH+), 1215.1 (MNa+).

Satisfactory microanalysis data obtained.

**Figure S4** 1H NMR of compound **5** in DMSO-*d6*

**Figure S5** 13C NMR of compound **5** in DMSO-*d6*

**Figure S6** +ve Electrospray MS of compound **5**

**Figure S7** A portion of the 19F NMR of a solution of the fluoride complex of compound **5** in DMSO-*d6* at room temperature (21˚C) showing coupling to four NH protons (J = 47Hz)

**Figure S8** 1H NMR titration of compound **1** with chloride anions in DMSO-d6. Crosses represent experimental shifts, curve is fitted to calculated shifts. K = 1025 M-1 (Errors are estimated to be <15%).

**Figure S9** 1H NMR titration of compound **1** with fluoride anions in DMSO-d6. Crosses represent experimental shifts, curve is fitted to calculated shifts. K = 1060 M-1 (Errors are estimated to be <15%).
